# Supplementary material for: Generation and transmission of inter-lineage recombinants in the SARS-CoV-2 pandemic
Source: medRxiv preprint, doi:10.1101/2021.06.18.21258689, version 1 (2021-06-18)

- 1    Generation and transmission of inter-lineage recombinants in the SARS-CoV-2
- 2    pandemic
- 3
- 4    **Jackson et al**
- 5
- 6    **Supplementary Information**

## Supplementary Figure Legends

### **Figure S1**

The distribution of minor allele frequencies from the read data for the 16 putative recombinants (red bars) and 20 samples suspected of being sequenced mixtures, either due to co-infection or laboratory contamination (grey bars). For each recombinant, the minor allele frequency is the mean across all sites that differ by a nucleotide change from the reference (MN908947.3) in it or either of its putative parentals by genetic similarity. For the mixtures, the minor allele frequency is the mean across the sites that differ by a nucleotide change from the reference at genomic positions where mutations occur in B.1.1.7.

### **Figure S2**

The nucleotide variation with respect to the reference sequence (MN908947.3; grey genome far bottom) for each of the recombinant genomes (middle coloured genomes in each panel) and their closest neighbours by genetic similarity among all UK sequences from the same time period, for the B.1.1.7-like and non-B.1.1.7-like regions of their genomes (top and bottom coloured genomes in each panel). Panels: A) Group B; B) Group C; C) Group D; D) CAMC-CBA018; E) CAMC-CB7AB3; F) MILK-103C712; G) QEUH-1067DEF.

### **Figure S3**

The distribution of the most frequent SARS-CoV-2 lineages in the NUTS1 location of each set (Groups A-D and the four singletons) of recombinants for the four weeks immediately preceding each set's (earliest) sample date. Here, B.1.177 refers to B.1.177 itself and all its descendant lineages (e.g. B.1.177.9); the same is true for B.1.36.

### **Figure S4**

The distribution of nucleotide variation in the original members of Group A (top four coloured rows) and the 41 additional sequences that are derived from it (bottom 41 coloured rows), with respect to the reference sequence (MN908947.3; very bottom grey sequence).

**Table S1**

Nucleotide, amino acid, or deletion states at the 22 sites where mutations define lineage B.1.1.7 from its immediate ancestor, for each putative recombinant. The genotype column names are in one of the following formats: (i) “snp”, followed by the nucleotide in MN908947.3 (reference), the position in the MN908947.3 genome, then the nucleotide in B.1.1.7; (ii) “aa” (amino acid), followed by the name of the coding sequence, the residue in MN908947.3, the position of the residue in the coding sequence, then the residue in B.1.1.7; (iii) “del” (deletion) followed by the first position of the deletion, then the length of the deletion. For the contents of the amino acid columns, an asterisk (\*) denotes a stop codon. For the contents of the deletion genotype columns, del=deletion present; ref=deletion absent. Lineage B.1.1.7 states are coloured red, and MN908947.3 alleles are coloured white. The mosaic structures visible here informed the first iteration of recombination detection.

| Sample Name  | Group | Sample Date | snp:C913T | aa:ORF1ab:T1001I | aa:ORF1ab:A1708D | snp:C5986T | aa:ORF1ab:I2230T | del:11288:9 | snp:C14676T | snp:C15279T | snp:T16176C | del:21765:6 | del:21991:3 | aa:s:N501Y | aa:s:A570D | aa:s:P681H | aa:s:T716I | aa:s:S982A | aa:s:D1118H | aa:ORF8:Q27* | aa:ORF8:R52I | aa:ORF8:Y73C | aa:N:D3L | aa:N:S235F |
|--------------|-------|-------------|-----------|------------------|------------------|------------|------------------|-------------|-------------|-------------|-------------|-------------|-------------|------------|------------|------------|------------|------------|-------------|--------------|--------------|--------------|----------|------------|
| CAMC-CBA018  | -     | 18/12/2020  | C         | T                | A                | C          | I                | ref         | C           | C           | T           | del         | del         | Y          | D          | H          | I          | A          | H           | *            | I            | C            | L        | F          |
| ALDP-11CF93B | A     | 30/01/2021  | C         | T                | A                | C          | I                | ref         | C           | C           | T           | del         | del         | Y          | D          | H          | I          | A          | H           | *            | I            | C            | L        | F          |
| ALDP-125C4D7 | A     | 06/02/2021  | C         | T                | A                | C          | I                | ref         | C           | C           | T           | del         | del         | Y          | D          | H          | I          | A          | H           | *            | I            | C            | L        | F          |
| LIVE-DFCFE   | A     | 14/02/2021  | C         | T                | A                | C          | I                | ref         | C           | C           | T           | del         | del         | Y          | D          | H          | I          | A          | H           | *            | I            | C            | L        | F          |
| ALDP-130BB95 | A     | 21/02/2021  | C         | T                | A                | C          | I                | ref         | C           | C           | T           | del         | del         | Y          | D          | H          | I          | A          | H           | *            | I            | C            | L        | F          |
| QEUH-CCCB30  | B     | 23/12/2020  | C         | T                | A                | C          | T                | del         | T           | T           | C           | del         | del         | Y          | D          | H          | I          | A          | H           | *            | I            | C            | L        | F          |
| QEUH-CD0F1F  | B     | 24/12/2020  | C         | T                | A                | C          | T                | del         | T           | T           | C           | del         | del         | Y          | D          | H          | I          | A          | H           | *            | I            | C            | L        | F          |
| MILK-1166F52 | C     | 24/01/2021  | T         | I                | D                | T          | T                | del         | T           | T           | C           | del         | del         | Y          | D          | H          | I          | A          | H           | Q            | R            | Y            | D        | S          |
| MILK-11C95A6 | C     | 30/01/2021  | T         | I                | D                | T          | T                | del         | T           | T           | C           | del         | del         | Y          | D          | H          | I          | A          | H           | Q            | R            | Y            | D        | S          |
| QEUH-109B25C | C     | 18/01/2021  | T         | I                | D                | T          | T                | del         | T           | T           | C           | del         | del         | Y          | D          | H          | I          | A          | H           | Q            | R            | Y            | D        | S          |
| MILK-126FE1F | D     | 07/02/2021  | C         | T                | A                | C          | I                | ref         | C           | C           | T           | ref         | ref         | Y          | D          | H          | I          | A          | H           | *            | I            | C            | L        | F          |
| RAND-12671E1 | D     | 02/02/2021  | C         | T                | A                | C          | I                | ref         | C           | C           | T           | ref         | ref         | Y          | D          | H          | I          | A          | H           | *            | I            | C            | L        | F          |
| RAND-128FA33 | D     | 02/02/2021  | C         | T                | A                | C          | I                | ref         | C           | C           | T           | ref         | ref         | Y          | D          | H          | I          | A          | H           | *            | I            | C            | L        | F          |
| CAMC-CB7AB3  | -     | 18/12/2020  | T         | I                | A                | C          | I                | ref         | C           | C           | T           | del         | del         | Y          | D          | H          | I          | A          | H           | *            | I            | C            | L        | F          |
| MILK-103C712 | -     | 12/01/2021  | C         | T                | A                | C          | I                | ref         | C           | C           | T           | ref         | ref         | N          | A          | P          | T          | S          | D           | *            | I            | C            | L        | F          |
| QEUH-1067DEF | -     | 17/01/2021  | T         | I                | D                | T          | T                | ref         | C           | C           | T           | ref         | ref         | N          | A          | P          | T          | S          | D           | Q            | R            | Y            | D        | S          |

**Table S2**

GISAID and ENA accession numbers for the 16 putative recombinant sequences.

| Sample       | Group | GISAID accession | ENA sample accession | ENA sample secondary accession | ENA run accession |
|--------------|-------|------------------|----------------------|--------------------------------|-------------------|
| ALDP-11CF93B | A     | EPI_ISL_989697   | ERS5764793           | SAMEA8077663                   | ERR5308556        |
| ALDP-125C4D7 | A     | EPI_ISL_1019487  | ERS5792357           | SAMEA8105282                   | ERR5323237        |
| ALDP-130BB95 | A     | EPI_ISL_1122630  | ERS5883487           | SAMEA8196877                   | ERR5414941        |
| LIVE-DFCFE   | A     | EPI_ISL_1104468  | ERS5872630           |                                | ERR5404883        |
| QEUH-CCCB30  | B     | EPI_ISL_782203   | ERS5522602           | SAMEA7775362                   | ERR5058070        |
| QEUH-CD0F1F  | B     | EPI_ISL_782442   | ERS5522673           | SAMEA7775433                   | ERR5058141        |
| MILK-1166F52 | C     | EPI_ISL_938901   | ERS5697106           | SAMEA8009867                   | ERR5272107        |
| MILK-11C95A6 | C     | EPI_ISL_1050799  | ERS5874115           |                                | ERR5406307        |
| QEUH-109B25C | C     | EPI_ISL_909004   | ERS5669824           | SAMEA7982538                   | ERR5232711        |
| MILK-126FE1F | D     | EPI_ISL_1057512  | ERS5812369           | SAMEA8125397                   | ERR5349458        |
| RAND-12671E1 | D     | EPI_ISL_1045772  | ERS5805519           | SAMEA8118538                   | ERR5335088        |
| RAND-128FA33 | D     | EPI_ISL_1042110  | ERS5809401           | SAMEA8122425                   | ERR5340986        |
| CAMC-CBA018  | -     | EPI_ISL_777766   | ERS5517714           | SAMEA7770468                   | ERR5054123        |
| CAMC-CB7AB3  | -     | EPI_ISL_777974   | ERS5517673           | SAMEA7770427                   | ERR5054082        |
| MILK-103C712 | -     | EPI_ISL_994038   | ERS5760589           | SAMEA8073454                   | ERR5304348        |
| QEUH-1067DEF | -     | EPI_ISL_917983   | ERS5674718           | SAMEA7987439                   | ERR5238288        |

**Table S3**

Phylogenetic placement and UF bootstrap support for the two parental tracts of each recombinant's genome, among the whole UK epidemic. For CAMC-CB7AB3, "Left" refers to the inner part of its genome, and "Right" refers to the outer part of its genome. The full phylogenies with bootstrap support are available at <https://github.com/COG-UK/UK-recombination-analysis>

| Sample       | Group | Left placement      | Left support | Right placement | Right support |
|--------------|-------|---------------------|--------------|-----------------|---------------|
| ALDP-11CF93B | A     | B.1.177             | 81           | B.1.1.7         | 100           |
| ALDP-125C4D7 | A     | B.1.177             | 81           | B.1.1.7         | 100           |
| LIVE-DFCFFE  | A     | B.1.177             | 81           | B.1.1.7         | 100           |
| ALDP-130BB95 | A     | B.1.177             | 81           | B.1.1.7         | 100           |
| QEUH-CCCB30  | B     | B.1.36.28           | 97           | B.1.1.7         | 100           |
| QEUH-CD0F1F  | B     | B.1.36.28           | 97           | B.1.1.7         | 100           |
| MILK-1166F52 | C     | B.1.1.7             | 100          | B.1.221.1       | 98            |
| MILK-11C95A6 | C     | B.1.1.7             | 100          | B.1.221.1       | 98            |
| QEUH-109B25C | C     | B.1.1.7             | 100          | B.1.221.1       | 98            |
| MILK-126FE1F | D     | B.1.36.17/B.1.36.39 | 100          | B.1.1.7         | 100           |
| RAND-12671E1 | D     | B.1.36.17/B.1.36.39 | 100          | B.1.1.7         | 100           |
| RAND-128FA33 | D     | B.1.36.17/B.1.36.39 | 100          | B.1.1.7         | 100           |
| CAMC-CB7AB3  | -     | B.1.177             | 39           | B.1.1.7         | 100           |
| CAMC-CBA018  | -     | B.1.177             | 94           | B.1.1.7         | 100           |
| MILK-103C712 | -     | B.1.177             | 100          | B.1.1.7         | 100           |
| QEUH-1067DEF | -     | B.1.1.7             | 100          | B.1.177         | 100           |

72 **Figure S1**  
73

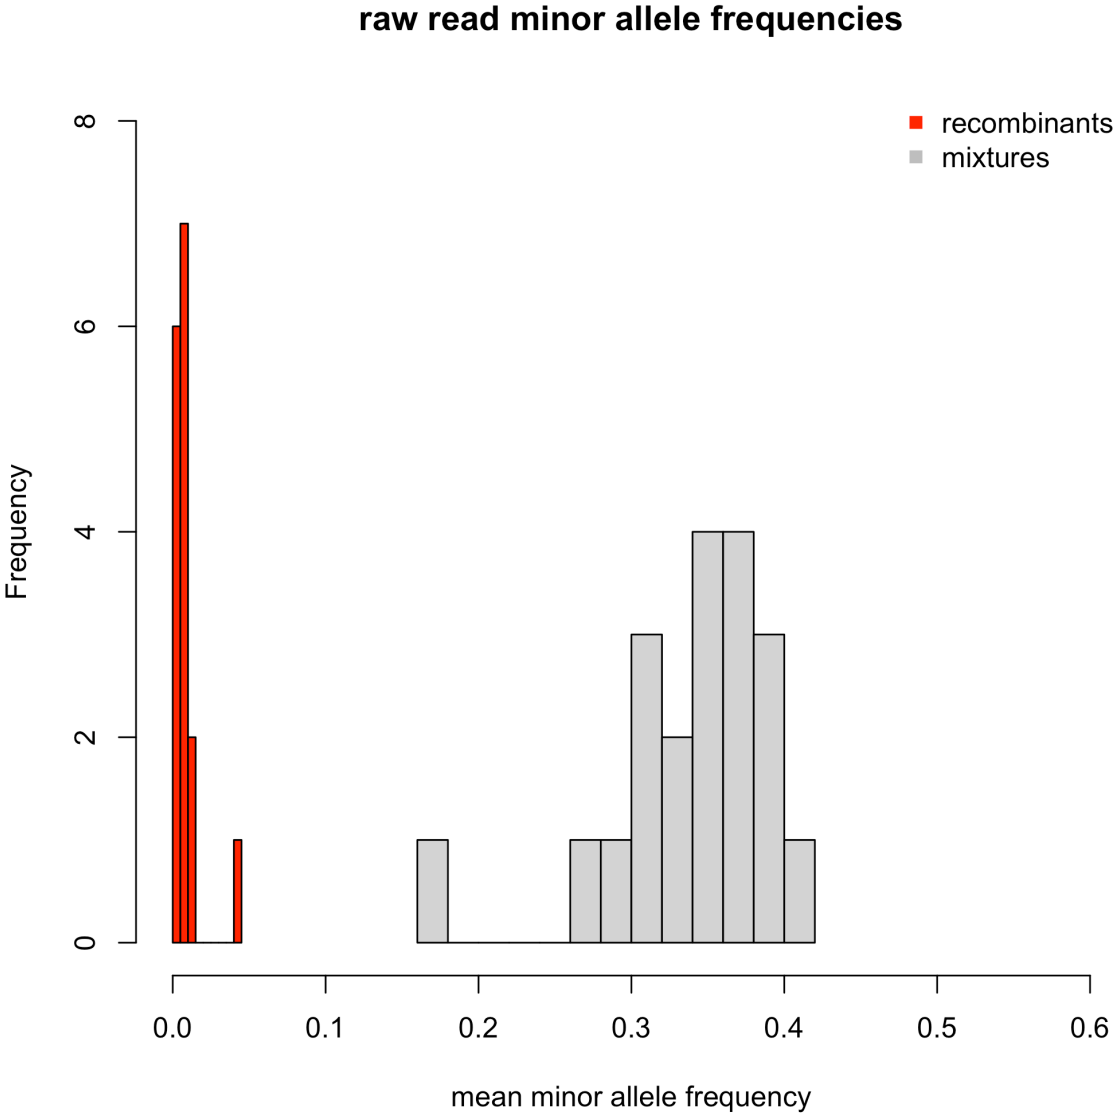

74  
75  
76

---

77  
78

# Figure S2

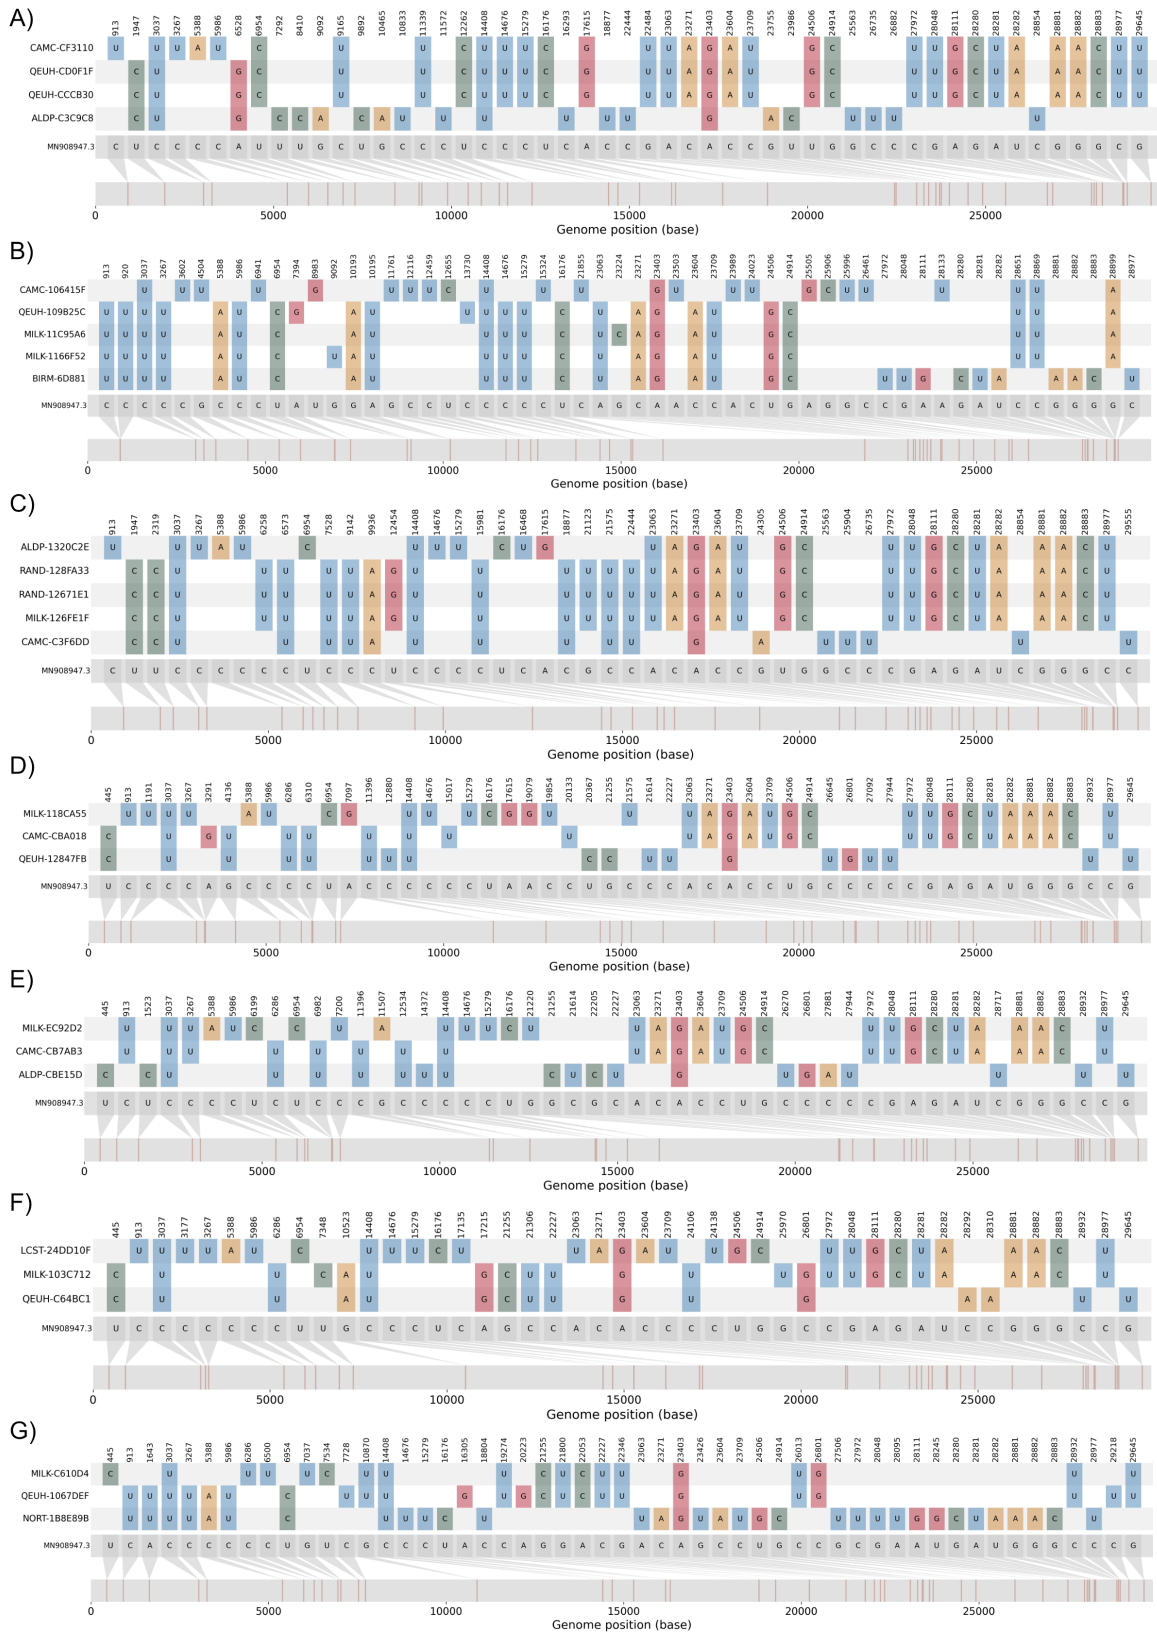

79  
80  
81

Figure S3

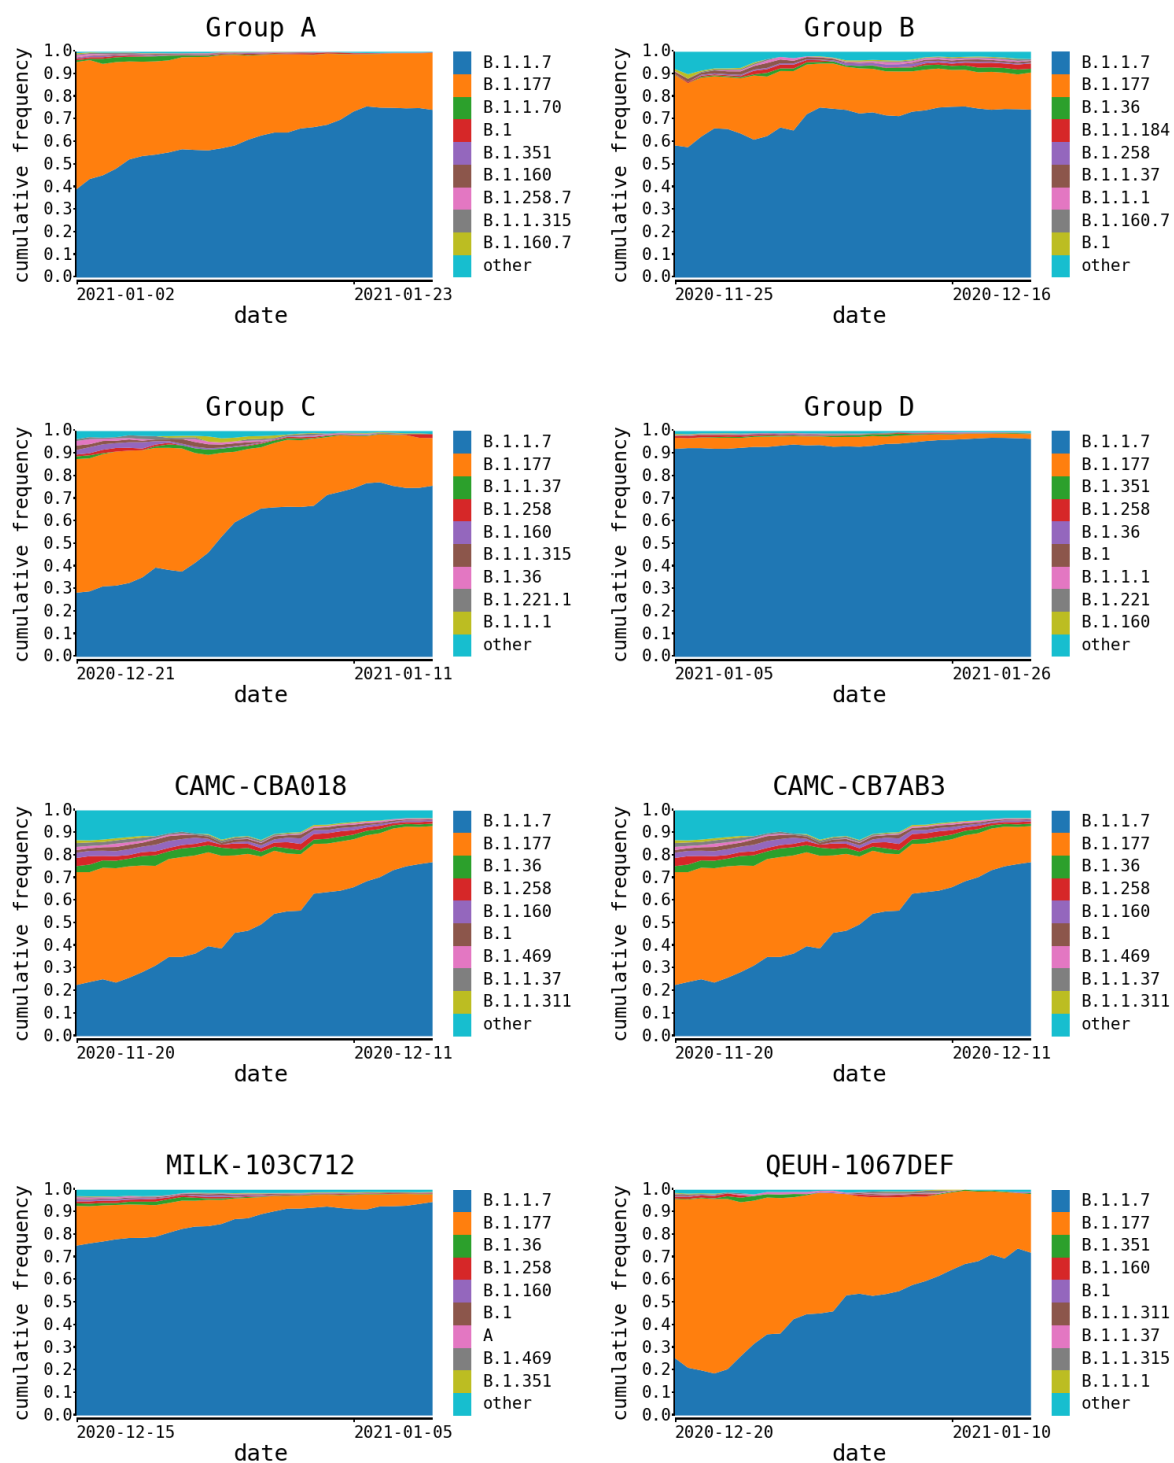

Figure S4

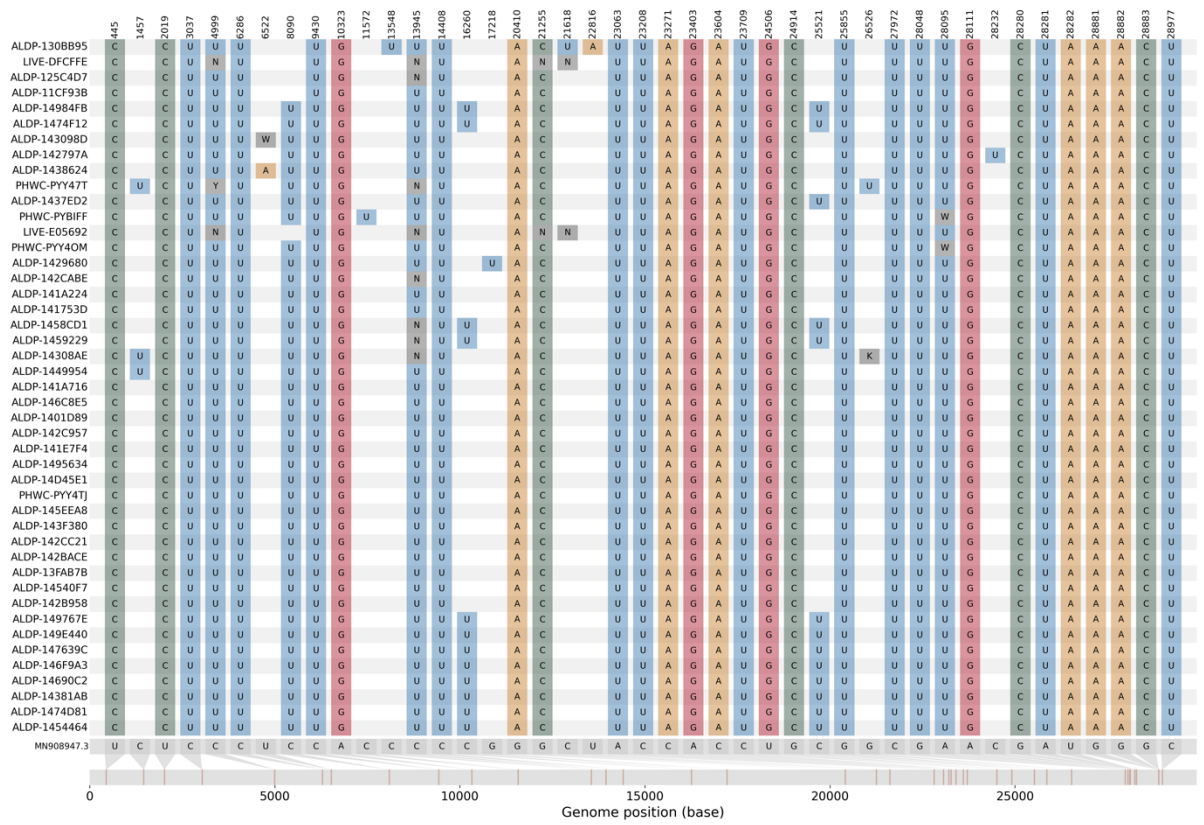

Supplement: Supplementary Information [file 258689_file02.pdf]
